# Supplementary material for: Specificity of DNA ADP-Ribosylation Reversal by NADARs
Source: MDPI journal article supplement (doi:10.3390/toxins16050208), 2024-04-28
Supplement: s1 [file s1]

# Specificity of DNA ADP-Ribosylation Reversal by NADARs

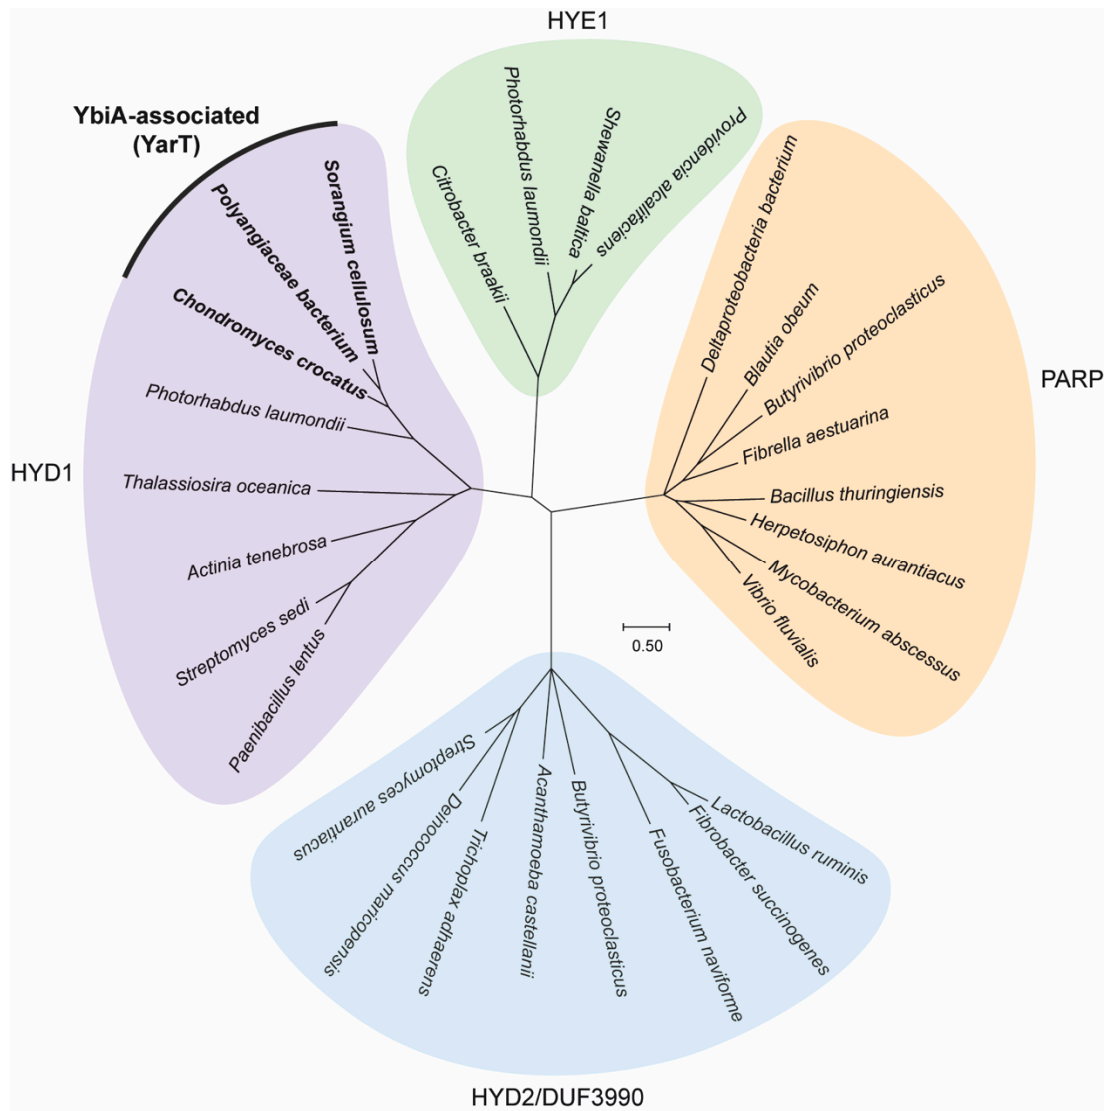

**Figure S1. Phylogenetic tree of bacterial ART toxins.** The YbiA-associated YarT ARTs cluster within the HYD1 subfamily. NCBI accession IDs are provided in Table S3.

**Table S1. NCBI accession IDs related to Figure 1.**

| Species                                | Accession number |
|----------------------------------------|------------------|
| <b>Bacterial YbiA-like</b>             |                  |
| <i>Chondromyces crocatus</i>           | WP_179955513.1   |
| <i>Escherichia coli</i>                | WP_001145126.1   |
| <i>Salmonella enterica</i>             | WP_140040215.1   |
| <i>Listeria monocytogenes</i>          | HAA3934926.1     |
| <b>Bacterial DarT-associated</b>       |                  |
| <i>Escherichia coli</i>                | WP_032219797.1   |
| <i>Geobacter lovleyi</i>               | WP_012470628.1   |
| <i>Sinorhizobium fredii</i>            | WP_014330845.1   |
| <b>Bacterial stand-alone</b>           |                  |
| <i>Escherichia coli</i>                | WP_001183948.1   |
| <i>Pseudomonas aeruginosa</i>          | WP_116806626.1   |
| <i>Streptomyces coelicolor</i>         | BDD75137.1       |
| <b>Phage</b>                           |                  |
| <i>Escherichia coli</i> T4 phage       | NP_049816.1      |
| <i>Klebsiella</i> phage vB KpnM KpV477 | YP_009288818.1   |
| <i>Rhizobium</i> phage RL38J1          | QGZ13929.1       |
| <b>Fungi</b>                           |                  |
| <i>Fomitopsis pinicola</i>             | EPS93933.1       |
| <i>Fomitopsis betulina</i>             | KAI0715550.1     |
| <b>Plant</b>                           |                  |
| <i>Arabidopsis thaliana</i>            | VYS59636.1       |
| <i>Theobroma cacao</i>                 | EOY09810.1       |
| <i>Cannabis sativa</i>                 | KAF4360218.1     |
| <b>Archaea</b>                         |                  |
| <i>Methanobrevibacter ruminantium</i>  | WP_012956765.1   |
| <i>Candidatus Lokiarchaeota</i>        | MBD3226909.1     |
| <i>Thermoplasmata</i>                  | MBE6519942.1     |
| <b>Nematode</b>                        |                  |
| <i>Ancylostoma caninum</i>             | RCN47812.1       |
| <i>Loa loa</i>                         | XP_003139559.1   |
| <i>Trichinella papuae</i>              | KRZ69666.1       |
| <b>Cephalochordate</b>                 |                  |
| <i>Brachiostoma floridae</i>           | XP_035698547     |
| <i>Brachiostoma belcheri</i>           | XP_019631451     |
| <b>Echinoderm</b>                      |                  |
| <i>Purple sea urchin</i>               | XP_793312        |
| <i>Painted urchin</i>                  | XP_054764016     |
| <i>Crown-of-thorns starfish</i>        | XP_022087852     |
| <b>Insect</b>                          |                  |
| <i>Bradysia coprophila</i>             | XP_037037289     |
| <i>Seven-spotted ladybird</i>          | XP_044764571     |

|                                 |              |
|---------------------------------|--------------|
| <i>Folsomia candida</i>         | XP_021960032 |
| <b>Crustacea</b>                |              |
| <i>Eurytemora affinis</i>       | XP_023334262 |
| <b>Mollusca</b>                 |              |
| <i>Golden apple snail</i>       | XP_025111217 |
| <i>Northern quahog</i>          | XP_045159950 |
| <i>Peltospirid snail</i>        | XP_041358894 |
| <b>Cnidaria</b>                 |              |
| <i>Dendronephthya gigantea</i>  | XP_028391651 |
| <b>Porifera</b>                 |              |
| <i>Amphimedon queenslandica</i> | XP_019853895 |

**Table S2. NCBI accession IDs related to Figure 3.**

| Species                                | Accession number |
|----------------------------------------|------------------|
| <b>YarT-associated YbiA proteins</b>   |                  |
| <i>Chondromyces crocatus</i>           | WP_179955513.1   |
| <i>Polyangiaceae bacterium</i>         | NUQ75852.1       |
| <i>Sorangium cellulosum</i>            | WP_020736121.1   |
| <b>YbiA proteins</b>                   |                  |
| <i>Escherichia coli</i>                | WP_001145126.1   |
| <i>Salmonella enterica</i>             | WP_140040215.1   |
| <i>Listeria monocytogenes</i>          | HAA3934926.1     |
| <i>Streptomyces griseiscabiei</i>      | WP_086756638.1   |
| <i>Gimesia chilikensis</i>             | QDT22974.1       |
| <b>DarT-associated NADAR proteins</b>  |                  |
| <i>Escherichia coli</i>                | WP_001183948.1   |
| <i>Geobacter lovleyi</i>               | WP_012470628.1   |
| <i>Sinorhizobium fredii</i>            | WP_014330845.1   |
| <i>Vibrio cholerae</i>                 | WP_172778105.1   |
| <i>Achinetobacter baumannii</i>        | WP_001129309.1   |
| <b>Stand-alone NADAR proteins</b>      |                  |
| <i>Escherichia coli</i>                | WP_032219797.1   |
| <i>Pseudomonas aeruginosa</i>          | WP_116806626.1   |
| <i>Streptomyces coelicolor</i>         | BDD75137.1       |
| <i>Methylococcaceae bacterium</i>      | NOQ36470.1       |
| <i>Mycobacterium tuberculosis</i>      | CNF61934.1       |
| <b>Phage NADAR proteins</b>            |                  |
| <i>Escherichia coli</i> T4 phage       | NP_049816.1      |
| <i>Klebsiella</i> phage vB KpnM KpV477 | YP_009288818.1   |
| <i>Rhizobium</i> phage RL38J1          | QGZ13929.1       |

**Table S3. NCBI accession IDs related to Figure S1.**

| Species                              | Accession number |
|--------------------------------------|------------------|
| <b>HYD1</b>                          |                  |
| <i>Chondromyces crocatus</i>         | WP_050429593.1   |
| <i>Polyangiaceae bacterium</i>       | NUQ75853 .1      |
| <i>Sorangium cellulosum</i>          | WP_020736122 .1  |
| <i>Paenibacillus lentus</i>          | AZK48993.1       |
| <i>Streptomyces sedi</i>             | WP_139640642.1   |
| <i>Photorhabdus laumondii</i>        | WP_011144745.1   |
| <i>Thalassiosira oceanica</i>        | EJK58845.1       |
| <i>Actinia tenebrosa</i>             | XP_031550746.1   |
| <b>HYD2</b>                          |                  |
| <i>Deinococcus maricopensis</i>      | WP_148234928.1   |
| <i>Streptomyces aurantiacus</i>      | WP_190851997.1   |
| <i>Fusobacterium naviforme</i>       | KAB0576670.1     |
| <b>DUF3990</b>                       |                  |
| <i>Lactobacillus ruminis</i>         | WP_014073068.1   |
| <i>Butyrivibrio proteoclasticus</i>  | WP_013281589.1   |
| <i>Fibrobacter succinogenes</i>      | WP_014546709.1   |
| <i>Trichoplax adhaerens</i>          | XP_002114834.1   |
| <i>Acanthamoeba castellanii</i>      | XP_004358258.1   |
| <b>HYE1</b>                          |                  |
| <i>Shewanella baltica</i>            | WP_006083171.1   |
| <i>Citrobacter braakii</i>           | WP_149330609.1   |
| <i>Photorhabdus laumondii</i>        | WP_011145957.1   |
| <i>Providencia alcalifaciens</i>     | WP_207910800.1   |
| <b>PARP</b>                          |                  |
| <i>Bacillus thuringiensis</i>        | EEM25277.1       |
| <i>Fibrella aestuarina</i>           | WP_041257497.1   |
| <i>Mycobacterium abscessus</i>       | WP_271960408.1   |
| <i>Vibrio fluvialis</i>              | WP_020332344.1   |
| <i>Deltaproteobacteria bacterium</i> | MBI1947919.1     |
| <i>Herpetosiphon aurantiacus</i>     | ABX07394.1       |
| <i>Blautia obeum</i>                 | WP_055060497.1   |
| <i>Butyrivibrio proteoclasticus</i>  | WP_013282825.1   |

**Table S4. Oligonucleotides used in this study.**

| Oligo         | Sequence (5'-3')                        | Purpose                         |
|---------------|-----------------------------------------|---------------------------------|
| PolyT-G       | TTTTTTGTTTTTTTTTTTTT                    | ADP-ribosylation activity assay |
| DarT-27mer-3  | CACGACACGAGCAGGCATGTCCACGTG             | ADP-ribosylation activity assay |
| GJ-P22        | GAGCTGTACAAGTCAGATCTCGAGCTC             | ADP-ribosylation activity assay |
| Protein X_fwd | ctagcgaattcgagctcatgGGCAGCAGCCATCATCATC | Cloning of <i>C. crocatus</i>   |
| Protein X_rev | ccgcaaaacagccaagcttTTAGAACGGGTTCGGGCC   | Protein X into                  |

|            |                      |                                          |
|------------|----------------------|------------------------------------------|
| pBAD33_fwd | AAGCTTGGCTGTTTTGGC   | pBAD33 by Gibson Assembly                |
| pBAD33_rev | CATGAGCTCGAATTCGCTAG | Vector amplification for Gibson Assembly |

**Table S5. Strains and plasmids used in this study.**

| Strain               | Description                                                                                                        | Source                        |
|----------------------|--------------------------------------------------------------------------------------------------------------------|-------------------------------|
| DH5α                 | <i>huA2 a(argF-lacZ)U169 phoA glnV44 a80a(lacZ)M15 gyrA96 recA1 relA1 endA1 thi-1 hsdR17</i>                       | NEB                           |
| BL21 (DE3)           | <i>fhuA2 [lon] ompT gal (λ DE3) [dcm] ΔhsdS λ DE3 = λ sBamHI ΔEcoRI-B int::(lacI::PlacUV5::T7 gene1) i21 Δnin5</i> | NEB                           |
| Rosetta™ BL21 (DE3)  | <i>F-ompT hsdSB(rB- mB-) gal dcm (DE3) pRARE (cam<sup>R</sup>)</i>                                                 | Novagen                       |
| <b>Plasmid</b>       |                                                                                                                    |                               |
| pET28a               | Medium copy plasmid containing the IPTG-inducible promoter; kan <sup>R</sup>                                       | Novagen                       |
| pBAD33               | Medium copy plasmid with an arabinose-inducible promoter; cam <sup>R</sup>                                         | Guzman et al., 1995 [62]      |
| pBAD33_Taq_darT2     | pBAD33 carrying <i>T. aquaticus darT</i> full-length; cam <sup>R</sup>                                             | Jankevicius et al., 2016 [18] |
| pET28_Taq_darG_macro | pET28a carrying <i>T. aquaticus darG</i> macrodomain (aa 1-155); kan <sup>R</sup>                                  | Jankevicius et al., 2016 [18] |
| pET28_SC_SCO5461     | pET28a carrying <i>S. coelicolor scarp (SCO5461)</i> full-length; kan <sup>R</sup>                                 | Lalić, J. et al., 2016 [19]   |
| pET28_EPEC_nadar     | pET28a carrying EPEC <i>nadar</i> full-length; kan <sup>R</sup>                                                    | This study                    |
| pET28_Ecoli_nadar    | pET28a carrying <i>E. coli</i> C7 <i>nadar</i> full-length; kan <sup>R</sup>                                       | Schuller et al., 2023 [33]    |
| pET28_T4_nadar       | pET28a carrying <i>E. coli</i> T4 phage (gp30.3) <i>nadar</i> full-length; kan <sup>R</sup>                        | This study                    |
| pET_Ecoli_ybia       | pET28a carrying <i>E. coli</i> K-12 <i>ybiA</i> full-length; kan <sup>R</sup>                                      | This study                    |
| pBAD33_Ecoli_darT1   | pBAD33 carrying <i>E. coli</i> C7 <i>darT1</i> full-length; cam <sup>R</sup>                                       | Schuller et al., 2023 [33]    |
| pBAD33_Croc_nadar    | pBAD33 carrying <i>C. crocatus nadar</i> full-length; cam <sup>R</sup>                                             | This study                    |
| pBAD33_Croc_yarT     | pBAD33 carrying <i>C. crocatus yarT</i> full-length; cam <sup>R</sup>                                              | This study                    |
